# Supplementary material for: Arsenic trioxide potentiates Gilteritinib-induced apoptosis in FLT3-ITD positive leukemic cells via IRE1a-JNK-mediated endoplasmic reticulum stress
Source: PubMed Central journal article supplement (PMC7298957; doi:10.1186/s12935-020-01341-5), 2020-06-17
Supplement: 12935_2020_1341_MOESM1_ESM.pdf [file 12935_2020_1341_MOESM1_ESM.pdf]

Figure S1

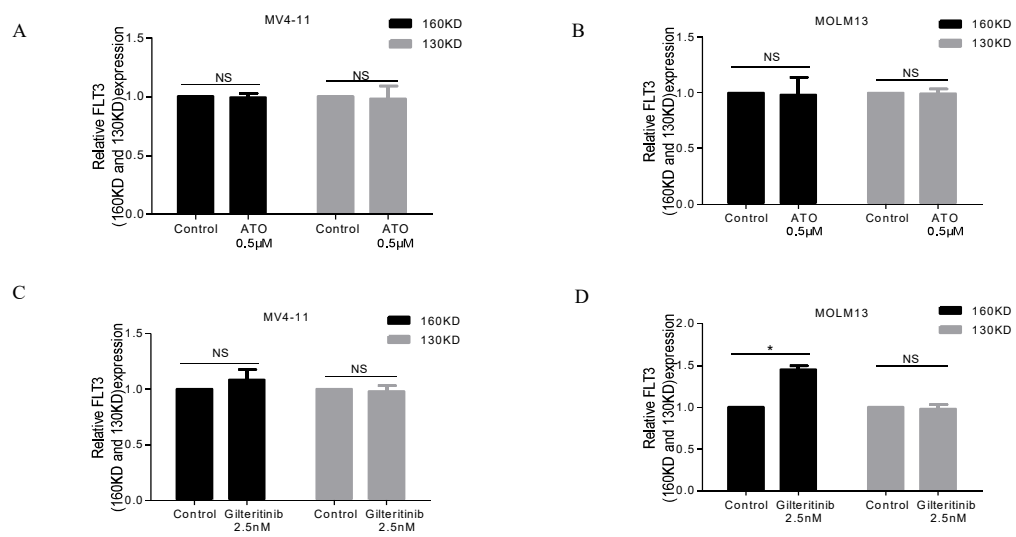

**Fig. S1 Analysis on FLT3 of 160KD and 130KD in ATO and Gilteritinib treated MV4-11 and MOLM13 cells. A-B** MV4-11 and MOLM13 cells were treated with ATO (0.5 $\mu$ M) for 48h and data of protein levels of FLT3 are shown as the mean $\pm$ SD. **C-D** MV4-11 and MOLM13 cells were treated with Gilteritinib (2.5nM) for 48h and data of protein levels of FLT3 are shown as the mean $\pm$ SD. \*P<0.05.

Figure S2

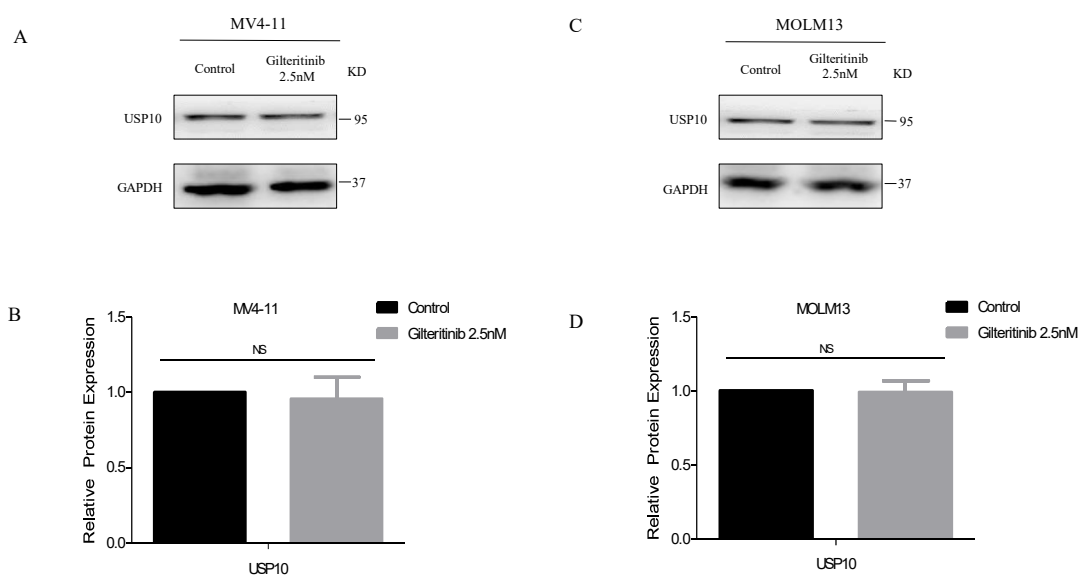

**Fig. S2 USP10 protein was not affected by Gilteritinib.** A-D, MV4-11 and MOLM13 cells were treated with Gilteritinib (2.5nM) for 48h and protein levels of USP10 were determined by western blot. Data are shown as the mean $\pm$ SD.
